# Supplementary material
Source: ML conference proceedings conference paper supplement (https://proceedings.neurips.cc/paper_files/paper/2023/hash/d08b6801f24dda81199079a3371d77f9-Abstract.html)
Supplement: Supplementary file 1 [file d08b6801f24dda81199079a3371d77f9-Supplemental-Datasets_and_Benchmarks.pdf]

---

# GeoDE: a Geographically Diverse Evaluation Dataset for Object Recognition

---

Vikram V. Ramaswamy<sup>1</sup>, Sing Yu Lin<sup>1</sup>, Dora Zhao<sup>2\*</sup>, Aaron B. Adcock<sup>3</sup>,  
Laurens van der Maaten<sup>3</sup>, Deepti Ghadiyaram<sup>4</sup>, Olga Russakovsky<sup>1</sup>

<sup>1</sup>Princeton University   <sup>2</sup>Sony AI   <sup>3</sup>Meta AI   <sup>4</sup>Runway

\*Work done as a graduate student at Princeton University

1 Here, we provide some more details about our experiments.

- 2 • In Sec A, we provide the datasheet for GeoDE , as in [4].
- 3 • In Sec B, we describe our heuristic to select object categories in more detail.
- 4 • In Sec C, we compare the GeoDE feature space to that of ImageNet [2]
- 5 • In Sec. E, we provide results when finetuning pre-trained models rather than just training
- 6 the final layer of a ResNet.
- 7 • In Sec. F, we give more details about GeoDE , including the counts of images of different
- 8 regions and categories, as well as more sample images from this dataset.

## 9 A Datasheet for GeoDE

10 We include the datasheet for GeoDE below, based on Datasheets for Datasets [4]<sup>1</sup>

### MOTIVATION

11 **For what purpose was the dataset created?** Was there a specific task in mind? Was there a specific  
12 gap that needed to be filled? Please provide a description.

13 GeoDE was created for 2 purposes: (1) To construct a more geographically diverse dataset for training  
14 and evaluation and (2) to understand what it would take to crowd-source an image dataset from scratch.

16 **Who created this dataset (e.g., which team, research group) and on behalf of which entity (e.g.,  
17 company, institution, organization)?**

18 GeoDE was created via a collaboration between the Princeton Visual AI lab and Meta research.

20 **What support was needed to make this dataset?** (e.g. who funded the creation of the dataset? If  
21 there is an associated grant, provide the name of the grantor and the grant name and number, or if it  
22 was supported by a company or government agency, give those details.)

23 Creation of GeoDE was partially supported by the National Science Foundation under Grant No.  
24 2145198. It was also supported by Meta AI and the Princeton SEAS Howard B. Wentz, Jr. Junior  
25 Faculty Award to OR.

26 **Any other comments?**

27 N/A

28

---

<sup>1</sup>The template used is from <https://github.com/AudreyBeard/Datasheets-for-Datasets-Template>

Submitted to the 37th Conference on Neural Information Processing Systems (NeurIPS 2023) Track on Datasets and Benchmarks. Do not distribute.

## COMPOSITION

29 **What do the instances that comprise the dataset represent (e.g., documents, photos, people,**  
30 **countries)?** Are there multiple types of instances (e.g., movies, users, and ratings; people and  
31 interactions between them; nodes and edges)? Please provide a description.

32 GeoDE consists of images of 40 different categories from 6 different regions. These categories and  
33 regions are fully listed in tables 2 and 3 of the main paper. Additionally, meta data for each image  
34 includes the type of phone used to take the picture, the GPS coordinates of the image, whether there  
35 are people present in the background of the image (note that there are no recognizable people in the  
36 dataset), and if a large fraction of the image consists of trees.

37 **How many instances are there in total (of each type, if appropriate)?**

38 There are 61, 940 images.

39 **Does the dataset contain all possible instances or is it a sample (not necessarily random)**  
40 **of instances from a larger set?** If the dataset is a sample, then what is the larger set? Is the  
41 sample representative of the larger set (e.g., geographic coverage)? If so, please describe how  
42 this representativeness was validated/verified. If it is not representative of the larger set, please  
43 describe why not (e.g., to cover a more diverse range of instances, because instances were withheld  
44 or unavailable).

45 GeoDE consists of a sample of images. The larger set would include all possible objects from all  
46 possible regions of the world. GeoDE is balanced across 6 regions and 40 objects,(regions chosen to  
47 maximise geodiversity).

48

49 **What data does each instance consist of?** “Raw” data (e.g., unprocessed text or images) or  
50 features? In either case, please provide a description.

51 Each instance consists of an image, location, object in the image, whether there are people in the  
52 background, whether a significant portion of the image contains trees.

53

54 **Is there a label or target associated with each instance?** If so, please provide a description.

55 Yes, each image is labelled with one of 40 objects.

56

57 **Is any information missing from individual instances?** If so, please provide a description,  
58 explaining why this information is missing (e.g., because it was unavailable). This does not include  
59 intentionally removed information, but might include, e.g., redacted text.

60 No

61

62 **Are relationships between individual instances made explicit (e.g., users’ movie ratings, social**  
63 **network links)?** If so, please describe how these relationships are made explicit.

64 N/A

65

66 **Are there recommended data splits (e.g., training, development/validation, testing)?** If so,  
67 please provide a description of these splits, explaining the rationale behind them.

68 No, we created training, validation and test splits by randomly splitting the dataset.

69

70 **Are there any errors, sources of noise, or redundancies in the dataset?** If so, please provide a  
71 description.

72 Possible errors include issues with labels of objects and countries. To the best of our knowledge this  
73 is limited to lesser than 1% of the dataset.

74

75 **Is the dataset self-contained, or does it link to or otherwise rely on external resources (e.g.,**  
76 **websites, tweets, other datasets)?** If it links to or relies on external resources, a) are there  
77 guarantees that they will exist, and remain constant, over time; b) are there official archival versions  
78 of the complete dataset (i.e., including the external resources as they existed at the time the dataset  
79 was created); c) are there any restrictions (e.g., licenses, fees) associated with any of the external  
80 resources that might apply to a future user? Please provide descriptions of all external resources and  
81 any restrictions associated with them, as well as links or other access points, as appropriate.

82 GeoDE is self contained

83

84 **Does the dataset contain data that might be considered confidential (e.g., data that is protected**  
85 **by legal privilege or by doctor-patient confidentiality, data that includes the content of**  
86 **individuals' non-public communications)?** If so, please provide a description.

87 No, GeoDE does not contain confidential data.

88

89 **Does the dataset contain data that, if viewed directly, might be offensive, insulting, threatening,**  
90 **or might otherwise cause anxiety?** If so, please describe why.

91 No

92

93 **Does the dataset relate to people?** If not, you may skip the remaining questions in this section.

94 No

95

96 **Does the dataset identify any subpopulations (e.g., by age, gender)?** If so, please describe how  
97 these subpopulations are identified and provide a description of their respective distributions within  
98 the dataset.

99 N/A

100

101 **Is it possible to identify individuals (i.e., one or more natural persons), either directly or**  
102 **indirectly (i.e., in combination with other data) from the dataset?** If so, please describe how.

103 N/A

104

105 **Does the dataset contain data that might be considered sensitive in any way (e.g., data that**  
106 **reveals racial or ethnic origins, sexual orientations, religious beliefs, political opinions or**  
107 **union memberships, or locations; financial or health data; biometric or genetic data; forms of**  
108 **government identification, such as social security numbers; criminal history)?** If so, please  
109 provide a description.

110 N/A

111

112 **Any other comments?**

113 N/A

114

## COLLECTION

115 **How was the data associated with each instance acquired?** Was the data directly observable (e.g.,  
116 raw text, movie ratings), reported by subjects (e.g., survey responses), or indirectly inferred/derived  
117 from other data (e.g., part-of-speech tags, model-based guesses for age or language)? If data was  
118 reported by subjects or indirectly inferred/derived from other data, was the data validated/verified? If  
119 so, please describe how.

120 Participants from across the world took photos of different objects and submitted it. They were  
121 compensated for their efforts. This data was manually checked and verified to contain the object.

122

123 **Over what timeframe was the data collected?** Does this timeframe match the creation timeframe  
124 of the data associated with the instances (e.g., recent crawl of old news articles)? If not, please  
125 describe the timeframe in which the data associated with the instances was created. Finally, list when  
126 the dataset was first published.  
127 Data was collected in 2022. It was first publicly released in January 2023.  
128

129 **What mechanisms or procedures were used to collect the data (e.g., hardware apparatus or**  
130 **sensor, manual human curation, software program, software API)?** How were these mechanisms  
131 or procedures validated?  
132 We used manual human curation: participants took photos of different objects. All images were  
133 verified by Appen’s quality analysis team.  
134

135 **What was the resource cost of collecting the data?** (e.g. what were the required computational  
136 resources, and the associated financial costs, and energy consumption - estimate the carbon footprint.  
137 See Strubell *et al.*[9] for approaches in this area.)  
138 Total cost for all images was \$54,000, not including researcher time. There were no models involved  
139 in collecting the dataset.  
140

141 **If the dataset is a sample from a larger set, what was the sampling strategy (e.g., deterministic,**  
142 **probabilistic with specific sampling probabilities)?**  
143 It is not a sample from a larger dataset.  
144

145 **Who was involved in the data collection process (e.g., students, crowdworkers, contractors) and**  
146 **how were they compensated (e.g., how much were crowdworkers paid)?**  
147 Participants from across the world were tasked with taking photos of specific objects and paid  
148 for their time. We partnered with Appen ([www.appen.com](http://www.appen.com)), who recruited and compensated the  
149 workers. Compensation varied depending on the region, but we got assurances that the pay was  
150 appropriate for the work.  
151

152 **Were any ethical review processes conducted (e.g., by an institutional review board)?** If so,  
153 please provide a description of these review processes, including the outcomes, as well as a link or  
154 other access point to any supporting documentation.  
155 No,  
156

157 **Does the dataset relate to people?** If not, you may skip the remainder of the questions in this  
158 section.  
159 No  
160

161 **Did you collect the data from the individuals in question directly, or obtain it via third parties**  
162 **or other sources (e.g., websites)?**  
163 N/A  
164

165 **Were the individuals in question notified about the data collection?** If so, please describe (or  
166 show with screenshots or other information) how notice was provided, and provide a link or other  
167 access point to, or otherwise reproduce, the exact language of the notification itself.  
168 N/A  
169

170 **Did the individuals in question consent to the collection and use of their data?** If so, please  
171 describe (or show with screenshots or other information) how consent was requested and provided,  
172 and provide a link or other access point to, or otherwise reproduce, the exact language to which the

173 individuals consented.

174 N/A

175

176 **If consent was obtained, were the consenting individuals provided with a mechanism to revoke**  
177 **their consent in the future or for certain uses?** If so, please provide a description, as well as a link  
178 or other access point to the mechanism (if appropriate)

179 N/A

180

181 **Has an analysis of the potential impact of the dataset and its use on data subjects (e.g., a data**  
182 **protection impact analysis)been conducted?** If so, please provide a description of this analysis,  
183 including the outcomes, as well as a link or other access point to any supporting documentation.

184 N/A

185

186 **Any other comments?**

187 N/A

188

## PREPROCESSING / CLEANING / LABELING

189 **Was any preprocessing/cleaning/labeling of the data done(e.g.,discretization or bucketing,**  
190 **tokenization, part-of-speech tagging, SIFT feature extraction, removal of instances, processing**  
191 **of missing values)?** If so, please provide a description. If not, you may skip the remainder of the  
192 questions in this section.

193 No.

194

195 **Was the “raw” data saved in addition to the preprocessed/cleaned/labeled data (e.g., to support**  
196 **unanticipated future uses)?** If so, please provide a link or other access point to the “raw” data.

197 N/A

198

199 **Is the software used to preprocess/clean/label the instances available?** If so, please provide a  
200 link or other access point.

201 N/A

202

203 **Any other comments?**

204 N/A

205

## USES

206 **Has the dataset been used for any tasks already?** If so, please provide a description.

207 GeoDE has been used to evaluate large scale models for geographical bias in this paper.

208

209 **Is there a repository that links to any or all papers or systems that use the dataset?** If so, please  
210 provide a link or other access point.

211 No.

212

213 **What (other) tasks could the dataset be used for?**

214 Additional uses of GeoDE could be trying to understand geodiversity of current datasets, to  
215 understand how webscraping and crowd-collected images differ (a small analysis done in section 5 of  
216 the main paper).

217

218 **Is there anything about the composition of the dataset or the way it was collected and**  
 219 **preprocessed/cleaned/labeled that might impact future uses?** For example, is there anything that  
 220 a future user might need to know to avoid uses that could result in unfair treatment of individuals or  
 221 groups (e.g., stereotyping, quality of service issues) or other undesirable harms (e.g., financial harms,  
 222 legal risks) If so, please provide a description. Is there anything a future user could do to mitigate  
 223 these undesirable harms?  
 224 All images in GeoDE were collected by participants with smart phones. Thus, the dataset does not  
 225 exhibit economic diversity.  
 226  
 227 **Are there tasks for which the dataset should not be used?** If so, please provide a description.  
 228 N/A  
 229  
 230 **Any other comments?**  
 231 N/A  
 232

## DISTRIBUTION

233 **Will the dataset be distributed to third parties outside of the entity (e.g., company, institution,**  
 234 **organization) on behalf of which the dataset was created?** If so, please provide a description.  
 235 Yes, GeoDE is freely available to download at <https://geodiverse-data-collection.cs.princeton.edu/>  
 236  
 237  
 238 **How will the dataset will be distributed (e.g., tarball on website, API, GitHub)?** Does the  
 239 dataset have a digital object identifier (DOI)?  
 240 GeoDE is available as a .zip file to download.  
 241  
 242 **When will the dataset be distributed?**  
 243 GeoDE is currently available.  
 244  
 245 **Will the dataset be distributed under a copyright or other intellectual property (IP) license,**  
 246 **and/or under applicable terms of use (ToU)?** If so, please describe this license and/or ToU, and  
 247 provide a link or other access point to, or otherwise reproduce, any relevant licensing terms or ToU,  
 248 as well as any fees associated with these restrictions.  
 249 No, GeoDE is released under a CC-BY license.  
 250  
 251 **Have any third parties imposed IP-based or other restrictions on the data associated with**  
 252 **the instances?** If so, please describe these restrictions, and provide a link or other access point  
 253 to, or otherwise reproduce, any relevant licensing terms, as well as any fees associated with these  
 254 restrictions.  
 255 No  
 256  
 257 **Do any export controls or other regulatory restrictions apply to the dataset or to individual**  
 258 **instances?** If so, please describe these restrictions, and provide a link or other access point to, or  
 259 otherwise reproduce, any supporting documentation.  
 260 No  
 261  
 262 **Any other comments?**  
 263 N/A  
 264

## MAINTENANCE

### **Who is supporting/hosting/maintaining the dataset?**

Currently, GeoDE is being hosted by the Princeton computer science department, specifically, Dr. Vikram Ramaswamy and Prof. Olga Russakovsky. For the long term, we are considering one of two options: partnering with Common Visual Data Foundation (CVDF; <http://www.cvd.foundation.org/>) or utilizing <https://researchdata.princeton.edu/news/2023-05-25/coming-soon-princeton-data-commons> (we've seen internal versions which look great for our use cases but are waiting for it to become public)

### **How can the owner/curator/manager of the dataset be contacted (e.g., email address)?**

Questions can be emailed to [vr23@cs.princeton.edu](mailto:vr23@cs.princeton.edu)

### **Is there an erratum? If so, please provide a link or other access point.**

No.

### **Will the dataset be updated (e.g., to correct labeling errors, add new instances, delete instances)?**

If so, please describe how often, by whom, and how updates will be communicated to users (e.g., mailing list, GitHub)?

Yes, the dataset will be updated as needed, by Vikram Ramaswamy. Updates will be posted on the GitHub repo along with the website, on how to access the corrected version.

### **If the dataset relates to people, are there applicable limits on the retention of the data associated with the instances (e.g., were individuals in question told that their data would be retained for a fixed period of time and then deleted)? If so, please describe these limits and explain how they will be enforced.**

N/A

### **Will older versions of the dataset continue to be supported/hosted/maintained? If so, please describe how. If not, please describe how its obsolescence will be communicated to users.**

No, older versions will not continue to be hosted, however, we will provide information on our github as well as the webpage, with a script to update the dataset (if applicable).

### **If others want to extend/augment/build on/contribute to the dataset, is there a mechanism for them to do so? If so, please provide a description. Will these contributions be validated/verified? If so, please describe how. If not, why not? Is there a process for communicating/distributing these contributions to other users? If so, please provide a description.**

No, there is no current mechanism to do so. Users can provide feedback / corrections to the dataset on github, which we will use to update the dataset.

### **Any other comments?**

N/A

## **B Selecting object categories for GeoDE**

In this section, we provide more details about the object selection heuristic we employed. We mainly used the GeoYFCC [3] dataset that was constructed to be geodiverse.

---

**Leave one out training**

---

curler, fan, footstool, chili, coconut, toilet, canoe, motorboat, mountain-bike, stupa, villa, backpack, baseball-glove, basin, basket, bat, bathtub, battery, beer-mug, belt, blade, bowl, broom, bucket, carryall, case, cash-machine, cassette, cleaver, cologne, cooler, counter, dinner-dress, dinner-jacket, dish, gown, grille, hammer, jacket, kettle, microphone, parka, porch, rack, remote-control, sandal, scale, shelf, shot-glass, stereo, stocking, stool, sweater, tape, teddy, timer, tripod, trouser, turntable, wardrobe, weight, wok, **woodcarving**, hot-pot, chewing-gum, cucumber, lime, fig, pineapple, jackfruit, kiwi, mango, basil, garlic, sage, lager, ale, porter, stout, champagne, rum, tequila, vodka, whiskey, mocha

---

**Linear SVM for region**

---

mountain-bike, bicycle, raft, ferry, ship, kayak, streetcar, bus, impala, car, footstool, bench, chair, mushroom, breakfast, vegetable, dessert, dinner, door, bowler-hat, house, building, chandelier, lamp, light, castle, acropolis, fortress, tower, palace, dome, architecture, memorial, statue, sculpture, gravestone, arch, temple, stupa, monastery, church, cathedral, chapel, mosque, signboard, grocery-store, shop, kitchen, lantern, doll, **coati**, cork, **primate**, alp, shore, curler, cologne, seashore, **gnu**, **hog**, **giraffe**, **arctic**, ice-rink, ski, **elephant**, guinness, makeup, circuit, geyser, skyscraper, **hippopotamus**, basketball, paintball, sword, hijab, fortification, craft, clock, stage, tractor, dagger, **defile**, bikini, swing, windmill, motor, brick, snowboard, course, volleyball, display, opera, railing, playground, veranda, wind-instrument, city-hall, ruin, portfolio, newspaper, airbus, bridge, airfield, **global-positioning-system**, brake-drum, **kid**, mangrove, motor-scooter, crane, intersection, plain, column, wardrobe, interface, guitar, costume, grand-piano, aircraft, factory, seaside, ball, sweet, gravy-boat, spotlight, **american-bison**, sail, beer, pier, road, tulip, grass, miniskirt, willow, flood, street, roof, slide, cliff, track, train, vehicle, boot, world, patio, window, rainbow, beacon, sidewalk, organ-pipe, tank, cable-car, grey, hall, map, cattle, airport, school, mountain, promontory, **monkey**, motorcycle, bubble, black, mirror, golf-club, skateboard, computer, university, denim, sky, rock, earphone, **descent**, garden, hill, library, tea, blush-wine, radio, bill, sunglass, ballpark, apparel, web, field-glass, reef, fountain, **downhill**, pen, cable, step, graffiti, conveyance, fabric, hovel, umbrella, iron, cloud, strand, toilet, walker, valley, airplane, cup, base, wire, **camel**, pizza, bathroom, lounge, dock, van, circuit-board, bell, **sheep**, book, fish, canyon, fire, **array**, rangefinder, coca-cola

---

**Clustering**

---

acropolis, cork, coati, footstool, stupa, impala, chili, **primate**, cologne, **gnu**, guinness, alp, **hog**, shore, boater, walker, plain, **hippopotamus**, raft, chandelier, curler, **giraffe**, **arctic**, bowler-hat, castle, geyser, boot, streetcar, rum, hijab, ski, temple, windmill, dagger, **fortification**, snowboard, coffee, ice-rink, display, cathedral, bench, bikini, lantern, slope, **elephant**, strand, sword, paintball, gravestone, tulip, golf-club, **downhill**, swing, volleyball, mushroom, monastery, **american-bison**, stage, cup, church, wardrobe, wind-instrument, skyscraper, sweet, **course**, tower, opera, sketch, circuit, chapel, **col**, motor, clock, railing, mangrove

---

Table 1: Prospective tags identified from GeoYFCC [3]. Tags in **red** seemed hard to picture. Tags in **blue** are of animals that might be hard to crowdsource

309 **Implementation details.** Features for GeoYFCC were extracted using a ResNet50 [5] pretrained on  
310 ImageNet [2]. We used Logistic regression, Linear SVM and KMeans clustering implementations  
311 from the sklearn library [6]. We used continents as regions. GeoYFCC [3] contains over 1200 tags,  
312 we ignored all tags with counts in the bottom 20th percentile, giving us a total of 745 tags.

313 First, we apply each of these methods to GeoYFCC to identify candidate tags.

- 314 • For each region  $R$ , we train a linear model using a feature extractor and images from all regions  
315 except  $R$  and a linear model trained on all images from all regions, to predict the presence or  
316 absence of each tag. We then applied both models to images from  $R$ . The difference in performance  
317 between these models allows us to measure the difference in appearance of the tag. We selected  
318 tags where in the weighted average precision on the region was less than 0.8\* the performance on  
319 other regions. This gave us a set of 277 tags such as “footstool”, “chili”, “case”, etc.
- 320 • For each tag  $T$ , we train a linear SVM to predict the region given the features of images containing  
321 tag  $T$ . If this model has high accuracy, this suggests that this tag is visually different across regions.  
322 We selected tags that had an accuracy of over 50%. 223 tags were identified in this manner. “Cork”,  
323 “bowler\_hat” and “mountain\_bike” are examples of tags found in this way.
- 324 • We clustered features of images containing tag  $T$ . We then computed the Gini impurity of each  
325 world region, and selected tags that had a median Gini value of at least 0.5. This gave us 75 tags in  
326 total. Examples of tags found in this way were “chili”, “footstool” and “stove”.

327 After identifying these tags, we first pruned them by removing tags that did not appear to correspond to  
328 an object. Examples of this include “arctic”, “descent”, etc. Second, we removed tags corresponding  
329 to wild animals, since these would not be found in all regions. Examples of tags removed in this

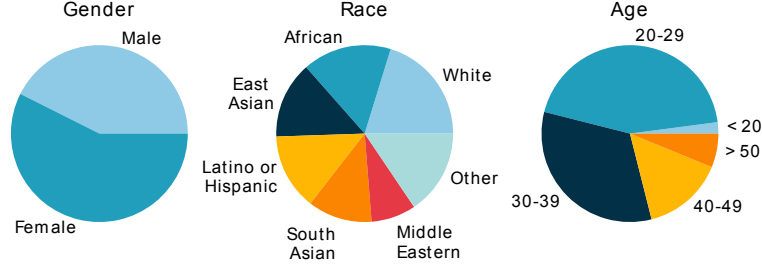

Figure 1: Participant demographics

manner were “gnu”, “camel”, etc. This gave us a list of 265 tags. Third, these tags were sometimes variants of objects, for example, we had tags like “stupa”, “temple”, “church”, “mosque” and “chapel”. Thus we grouped tags based on meaning. Other examples included “breakfast”, “dinner” and “dessert” as “plate of food”, “stool”, “footstool” and “bench” as “chair”, etc. This gave us a list of objects we could collect, e.g. “religious buildings”, “plate of food”, “toy”.

We also provide the user demographics of the participants (Fig. 1). As shown, images in GeoDE were provided by people of varying genders, ethnicities and ages.

## C Comparison with ImageNet

In this section, we run more comparisons of GeoDE with ImageNet [2] and DollarStreet [8].

### C.1 Comparison to ImageNet

We note that the comparison to GeoYFCC [3] in Sec. 5 in the main text required us to use tags which are noisy. Thus, to compare GeoDE to another web-scraped dataset, we compare GeoDE to ImageNet in this section, checking how much the feature spaces differ.

We find a subset of ImageNet21k as outlined in Sec. 6, and extract features using a PASS [1] trained ResNet50 [5] model. Other implementation details remain the same as in Sec 5 in the main paper.

We first use a Logistic regression model to predict the dataset that the features are taken from and this has an accuracy of 96.0%, showing that the feature space is very different. We also visualize TSNE plots of different objects in figure 2.

### C.2 Comparison with DollarStreet

Compared to GeoDE, DollarStreet [8] contains a lot more categories, thus resulting in much fewer images per category (on average, the top 40 object categories in DollarStreet contain only 382 images, whereas GeoDE has an average of 1548 images per category). Thus, when filtering images to comprise of only common categories between both datasets, we end up with much fewer images for DollarStreet. We run small scale tests to understand how these images differ from those in GeoDE.

**Relative value of an image.** Similar to the canonical work on dataset bias [10], we measure the relative value of an image from GeoDE and DollarStreet. That is, we measure the number of training images needed for strong cross-dataset generalization. Concretely, we select 13 classes from DollarStreet which (1) appear in GeoDE, and (2) have more than 100 images. We restrict both datasets to these 13 classes, resulting in 4,788 images for DollarStreet and 17,245 images for GeoDE. We now extract features using a PASS trained network, and train linear models to predict the 13 classes. First, we train a baseline model on 250 randomly sampled DollarStreet images and evaluate it on the remaining DollarStreet images; we then train models with increasing numbers of images from GeoDE until we match the accuracy of the DollarStreet-trained baseline. This occurs with 3,000 GeoDE training images. Next, we do a similar process for a baseline trained on 250

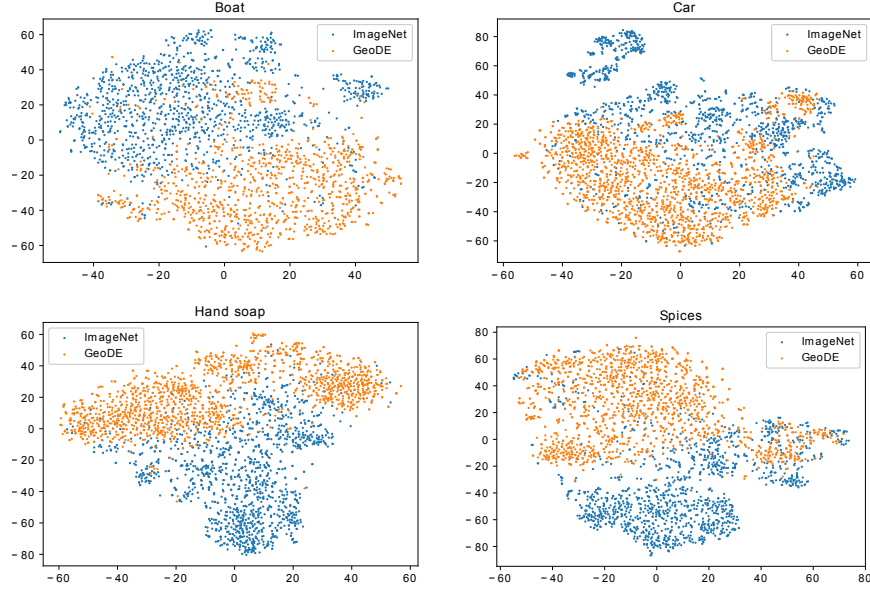

Figure 2: We visualize the TSNE plots for several of object classes using ImageNet and GeoDE . While the features do overlap slightly, on the whole, they are very different for dataset distributions, even within each category.

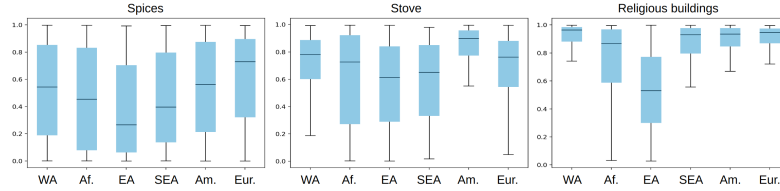

Figure 3: We visualize the probabilities assigned by CLIP to different images from the same class as a box plot. We see that the images across different regions have scores that vary in different ways: for “spices”, we see a large variance for all regions; for “stoves”, the variance is large for stoves from Africa, and Southeast and East Asia, but much smaller for other regions. For “religious buildings”, we see that the scores are just much lower for buildings in East Asia.

364 randomly sampled GeoDE images. However, we are unable to match its accuracy on GeoDE using  
 365 DollarStreet training images, even after using all 4, 788 images of these classes, showing a higher  
 366 relative value per image in GeoDE .

## 367 D More results using GeoDE as an evaluation dataset

368 Here, we provide more more analysis performed on using GeoDE as an evaluation dataset. As shown  
 369 in sec. 5 of the main text, CLIP models perform worse on certain objects (e.g “house”, “spices”,  
 370 “medicine”, etc.). Visualizing the probabilities assigned to different images from the same class as  
 371 a box plot, we see different scenarios emerge: the variance of scores is large for all regions, as in  
 372 the case of spices; the variance is large for certain regions, as in the case of stoves from Africa and  
 373 East and Southeast Asia, or the scores are much lower for a specific region, as in the case of religious  
 374 buildings in East Asia (3).

## 375 E More results when training with GeoDE

376 In this section, we provide results for the incremental training with GeoDE for different regions that  
 377 were not presented in Sec 7, and provide results when fine-tuning a ResNet50 model, rather than  
 378 freezing the layer weights.

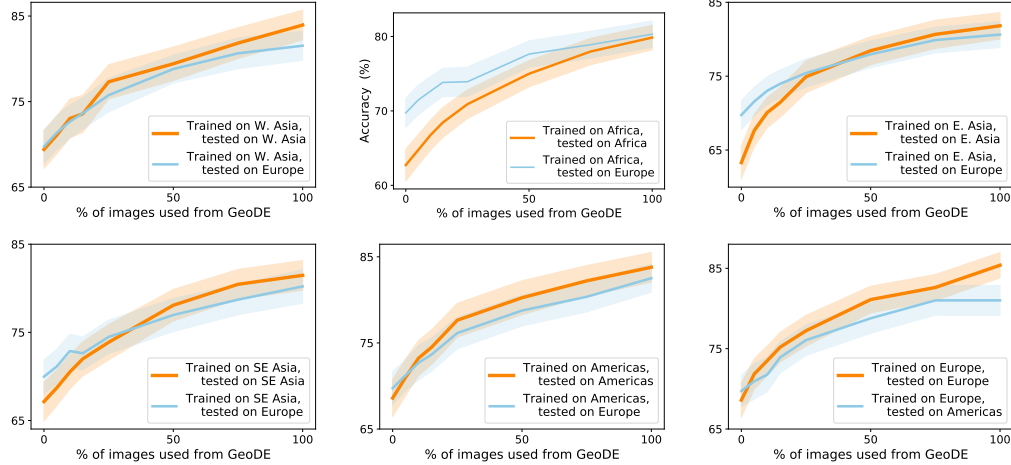

Figure 4: We visualize the increase in accuracy as images are incrementally added in from a region. We find that while adding any GeoDE regional images increases the performance of the model on European images, it has a larger effect on the region the images were drawn from.

### E.1 Results from incrementally adding additional regions

We visualize the improvement in the accuracy as we incrementally add in images from different regions (Sec. 6.2 in the main text). We can see that the performance both within the specific region and in Europe (compared to Americas when considering Europe) increase with the additional GeoDE data. We see that the increase within the region is larger than that of the control, showing that these images are from different domains. (Fig. 4)

### E.2 Results from finetuning a ResNet50 model

**Implementation details.** We use a ResNet50 [5] model pretrained on Imagenet and fine tune the weights using different fractions of the ImageNet and GeoDE datasets as mentioned in Sec. 7 in the main paper. We train the model with an SGD optimizer, learning rate = 0.1, and momentum=0.9. Other implementation details remain the same as before.

**Results.** While the overall trend of the results are the same, we see that these results are slightly noisier, potentially because the model overfits to the small training set (Fig. 5).

### E.3 Performance on individual countries

We measure the performance of models on individual countries within each region of GeoDE. We use two different models: first, we use the CLIP [7] model to understand performance of current models on GeoDE. Next, we train a simple linear model of features extracted from PASS [1] for the GeoDE dataset, and measure performance on individual countries. Implementation details for the CLIP model are the same as in Sec. 6 in the main paper, implementation details for the GeoDE model are as in section 7.1 of the main paper. Accuracies are computed for all countries with at least 25 images in the test set.

Tab. 2 summarizes our results for both. When using a pre-trained model like CLIP, we do notice differences between accuracies of countries within each region, however, we note that the overall trend in accuracy remains roughly the same. When training with images from GeoDE, discrepancies between countries within each region further reduces.

## F More details about the dataset

In this supplementary section, we provide counts of the objects per region in GeoDE as well as more examples of images from this dataset.

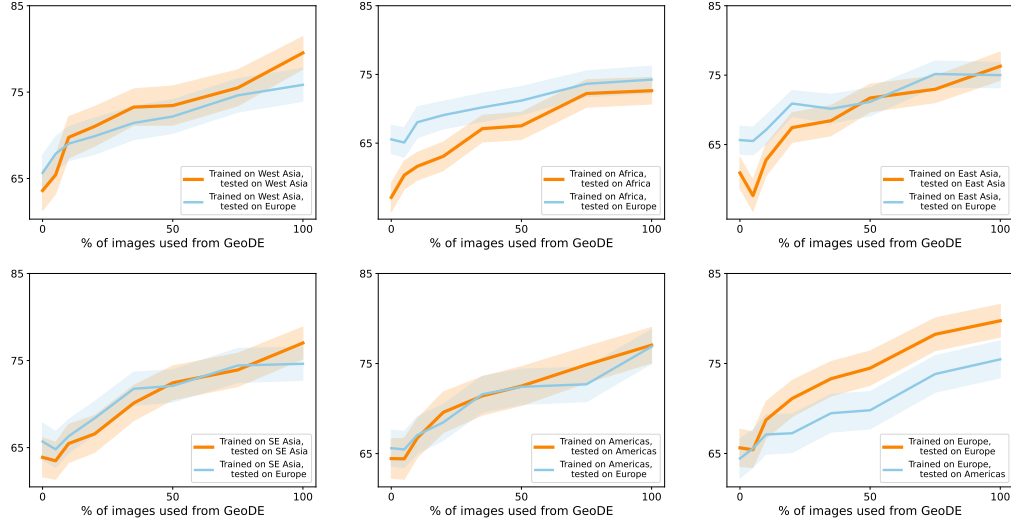

Figure 5: We visualize the increase in accuracy as images are incrementally added in from a region when finetuning a ResNet50 model. Similar to Fig. 10 in the main text, we see that adding in GeoDE images increases performance more in the region than a control.

|               | CLIP [7] model |     |         |           | Train on GeoDE |     |         |                |
|---------------|----------------|-----|---------|-----------|----------------|-----|---------|----------------|
|               | Average        | STD | Minimum | Country   | Average        | STD | Minimum | Country        |
| Africa        | 79.4           | 2.9 | 75.4    | Nigeria   | 86.7           | 1.6 | 84.5    | Egypt          |
| Americas      | 84.4           | 0.2 | 84.1    | Argentina | 88.8           | 1.0 | 87.7    | Argentina      |
| EastAsia      | 80.2           | 2.0 | 77.2    | China     | 89.0           | 1.1 | 87.9    | Japan          |
| Europe        | 85.9           | 3.6 | 78.3    | Portugal  | 91.9           | 1.8 | 89.2    | United Kingdom |
| SouthEastAsia | 82.7           | 1.1 | 81.4    | Indonesia | 88.3           | 1.0 | 87.0    | Indonesia      |
| WestAsia      | 82.3           | 2.0 | 79.1    | Jordan    | 88.9           | 3.6 | 84.2    | Saudi Arabia   |

Table 2: We measure the performance of a CLIP based model as well as model trained on GeoDE on individual countries within each region. For each region, we report the average accuracy, the standard deviation, and the country with the minimum accuracy for all countries with over 25 images. We find that while a pretrained model does show significant discrepancies among countries within the same region, training on GeoDE data does reduce this.

As mentioned before, GeoDE is mostly balanced across both region and object: for most part, we were able to get atleast 150 images per region per object, with a few exceptions (“wheelbarrow” in 2 regions; “monument”, “boat” and “flag” in 1 region). See Tab. 3 for full counts.

We also provide more examples of the images from GeoDE in the Figures Figs. 6 to 19.

## References

- [1] Yuki M. Asano, Christian Rupprecht, Andrew Zisserman, and Andrea Vedaldi. Pass: An imagenet replacement for self-supervised pretraining without humans. *NeurIPS Track on Datasets and Benchmarks*, 2021.
- [2] J. Deng, W. Dong, R. Socher, L.-J. Li, K. Li, and L. Fei-Fei. ImageNet: A Large-Scale Hierarchical Image Database. In *CVPR*, 2009.
- [3] Abhimanyu Dubey, Vignesh Ramanathan, Alex Pentland, and Dhruv Mahajan. Adaptive methods for real-world domain generalization. In *CVPR*, 2021.
- [4] Timnit Gebru, Jamie Morgenstern, Briana Vecchione, Jennifer Wortman Vaughan, Hanna Wallach, Hal Daumé III, and Kate Crawford. Datasheets for datasets. 2021.
- [5] Kaiming He, Xiangyu Zhang, Shaoqing Ren, and Jian Sun. Deep residual learning for image recognition. In *CVPR*, 2016.
- [6] F. Pedregosa, G. Varoquaux, A. Gramfort, V. Michel, B. Thirion, O. Grisel, M. Blondel, P. Prettenhofer, R. Weiss, V. Dubourg, J. Vanderplas, A. Passos, D. Cournapeau, M. Brucher, M. Perrot, and E. Duchesnay. Scikit-learn: Machine learning in Python. *JMLR*, 2011.
- [7] Alec Radford, Jong Wook Kim, Chris Hallacy, Aditya Ramesh, Gabriel Goh, Sandhini Agarwal, Girish Sastry, Amanda Askell, Pamela Mishkin, Jack Clark, Gretchen Krueger, and Ilya Sutskever. Learning transferable visual models from natural language supervision. In *ICML*, 2021.

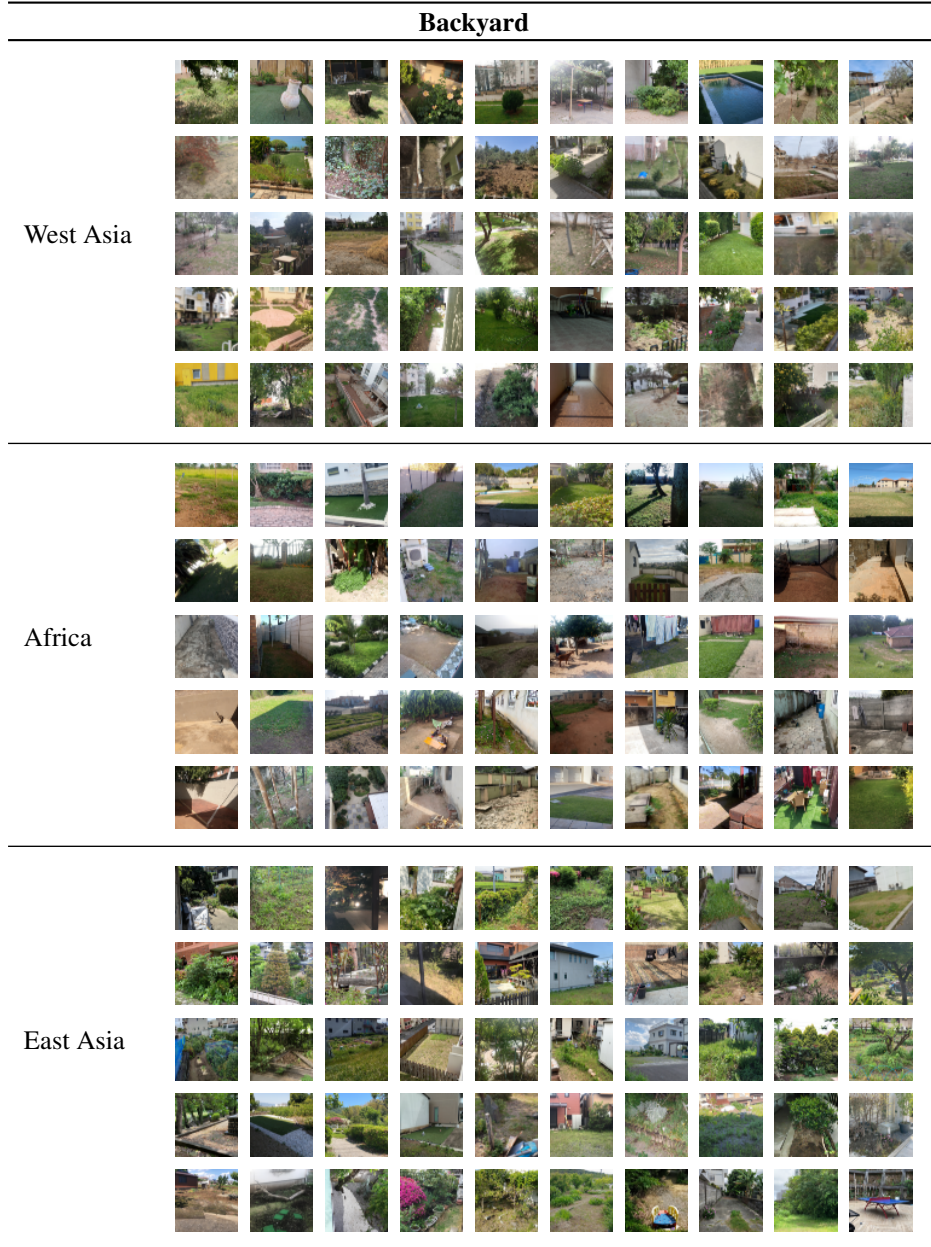

Figure 6: Randomly chosen images for “backyard” for 3 regions. We notice that some of these are backyards made of concrete (West Asia: r2c1, r3c4, etc., Africa: r3c1 ,r4c9, r5c3, etc.,) or do not contain lawns (West Asia: r3c1, r2c5, etc., Africa:r5c1-5, etc., East Asia: r2c4, r5c1, r5c4-6, etc.)

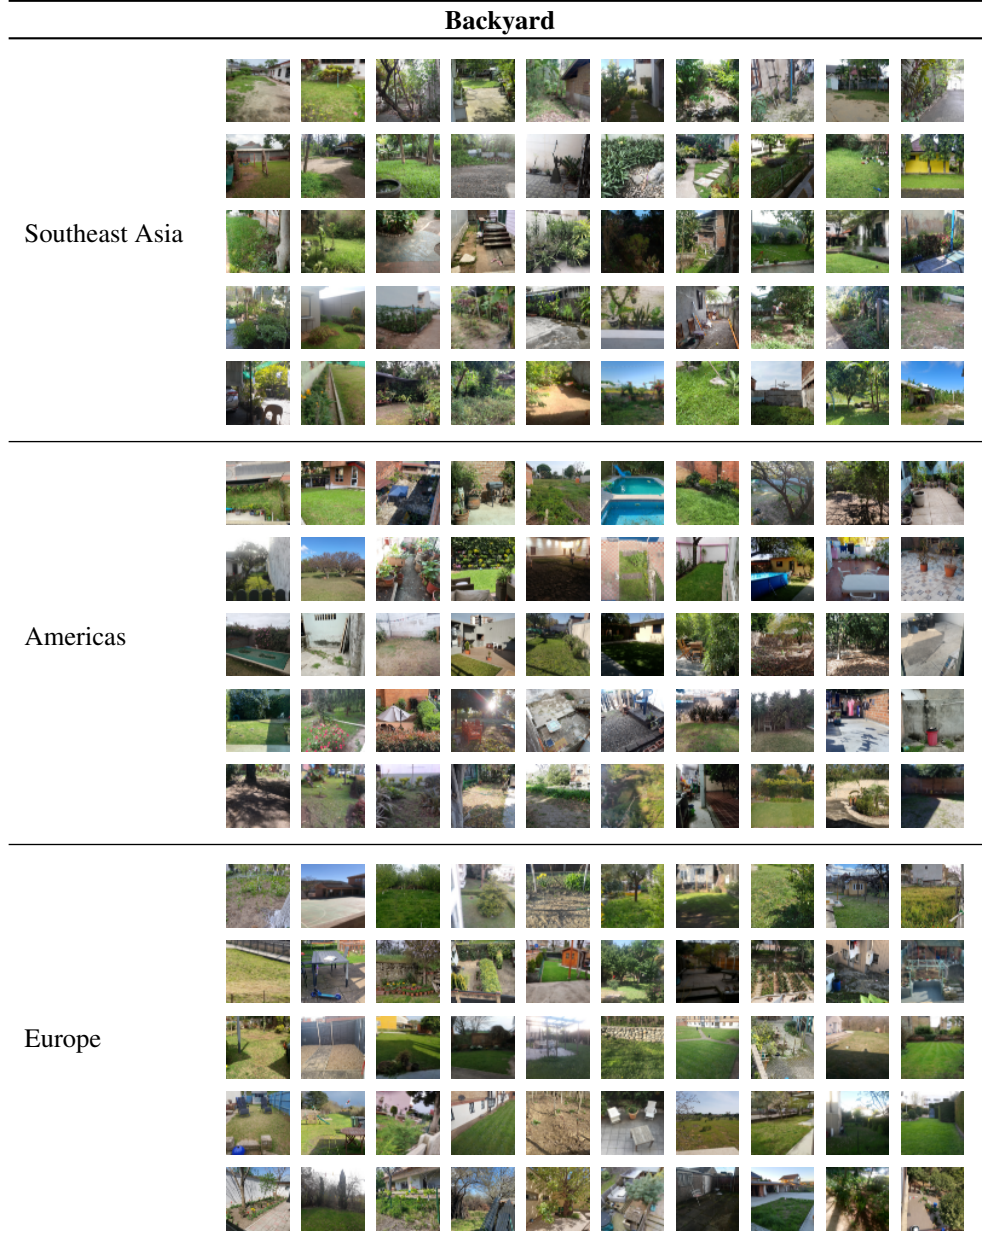

Figure 7: Randomly chosen images for “backyard” for the 3 other regions. Again, we see that regions tend to have backyards made of concrete or paved (Southeast Asia: r1c8, r2c5, r3c3 as examples, Americas: r1c9, r1c10, r2c10, etc., Europe: r3c2, r4c5, etc ), or do not contain lawns (Southeast Asia: r1c1, r1c9, etc., Americas: r3c2, r3c3, etc., Europe: r3c2, r5c9, etc.)

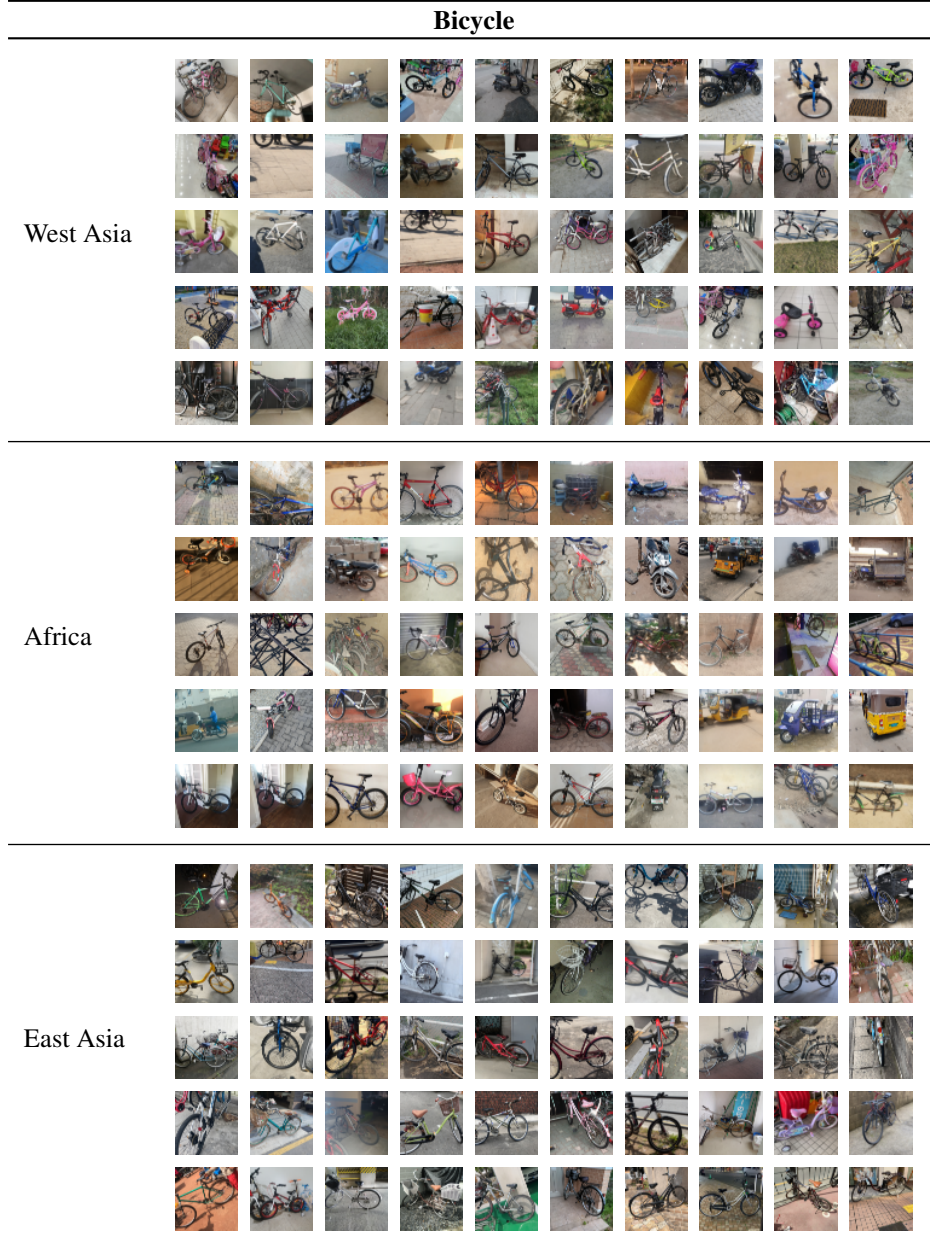

Figure 8: Randomly chosen images for “bicycle” for 3 regions. While most images are of standard bicycles, we notice a couple of interesting images: tricycle (West Asia: r4c9), rickshaws (Africa: r2c8, r2c10, r4c8, r4c10), and motorized cycles (West Asia: r1c8). There are also a lot of children’s bicycles.

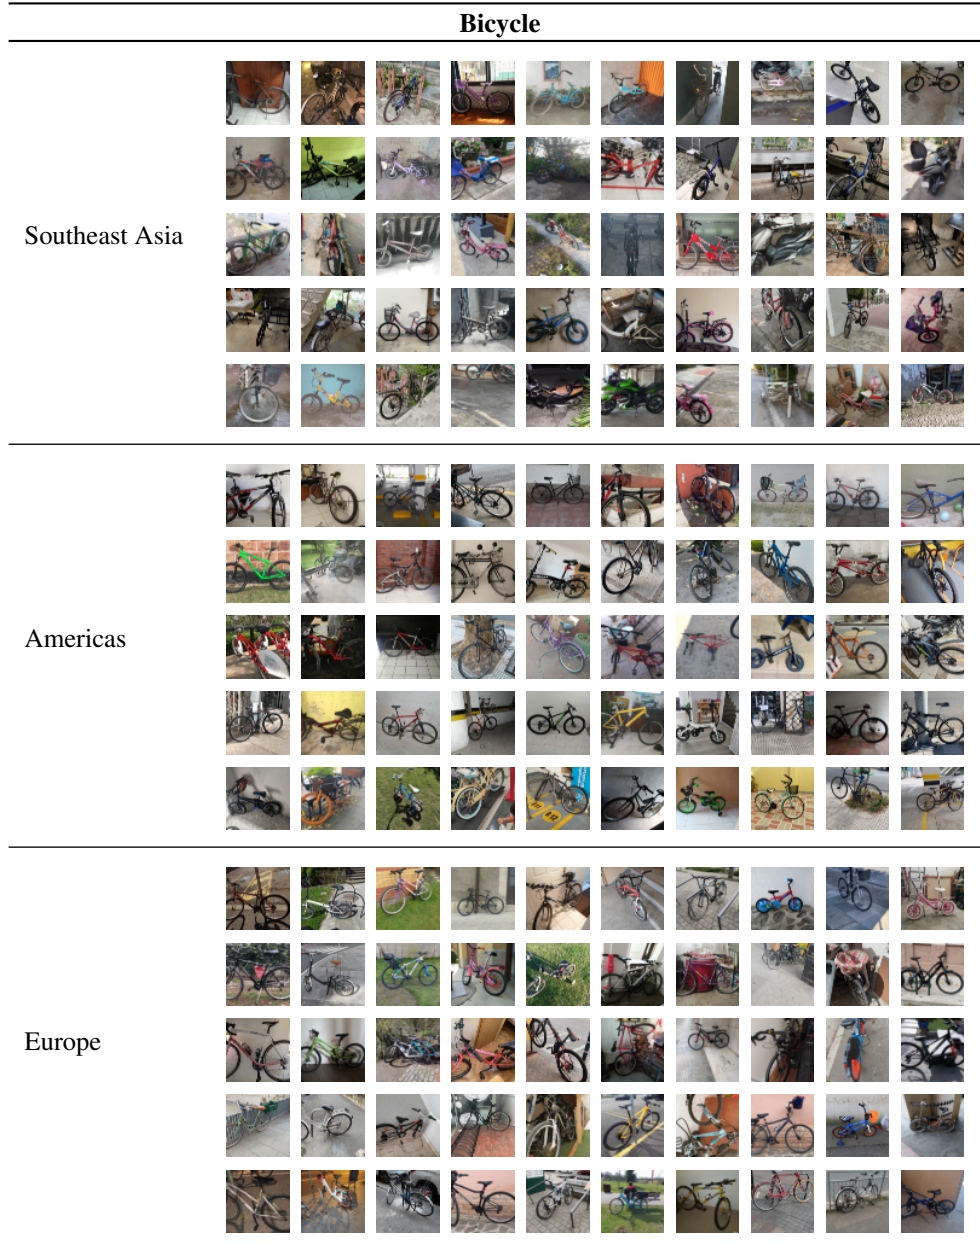

Figure 9: Randomly chosen images for “bicycle” for the 3 other regions. We see more motorized cycles (Southeast Asia: r5c6) as well as several children’s bicycles.

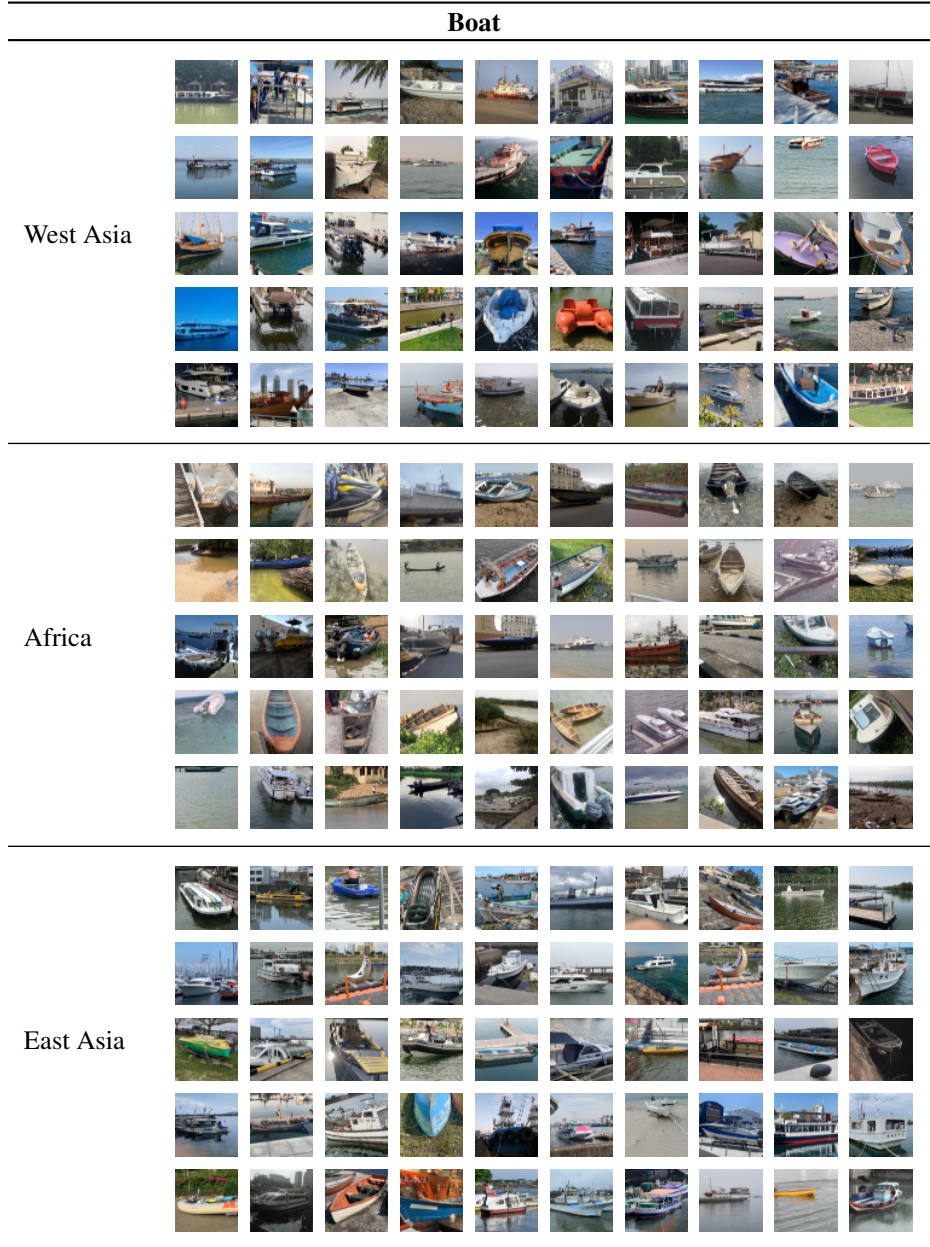

Figure 10: Randomly chosen images for “boat” for 3 regions. We see a variety of boats including larger ships in West Asia (r1c1, r1c2, r1c5, r4c1, r5c1), smaller kayaks and canoes in Africa (r1c8-9, r2c1-4, r4c2 , etc ), and a mix in East Asia.

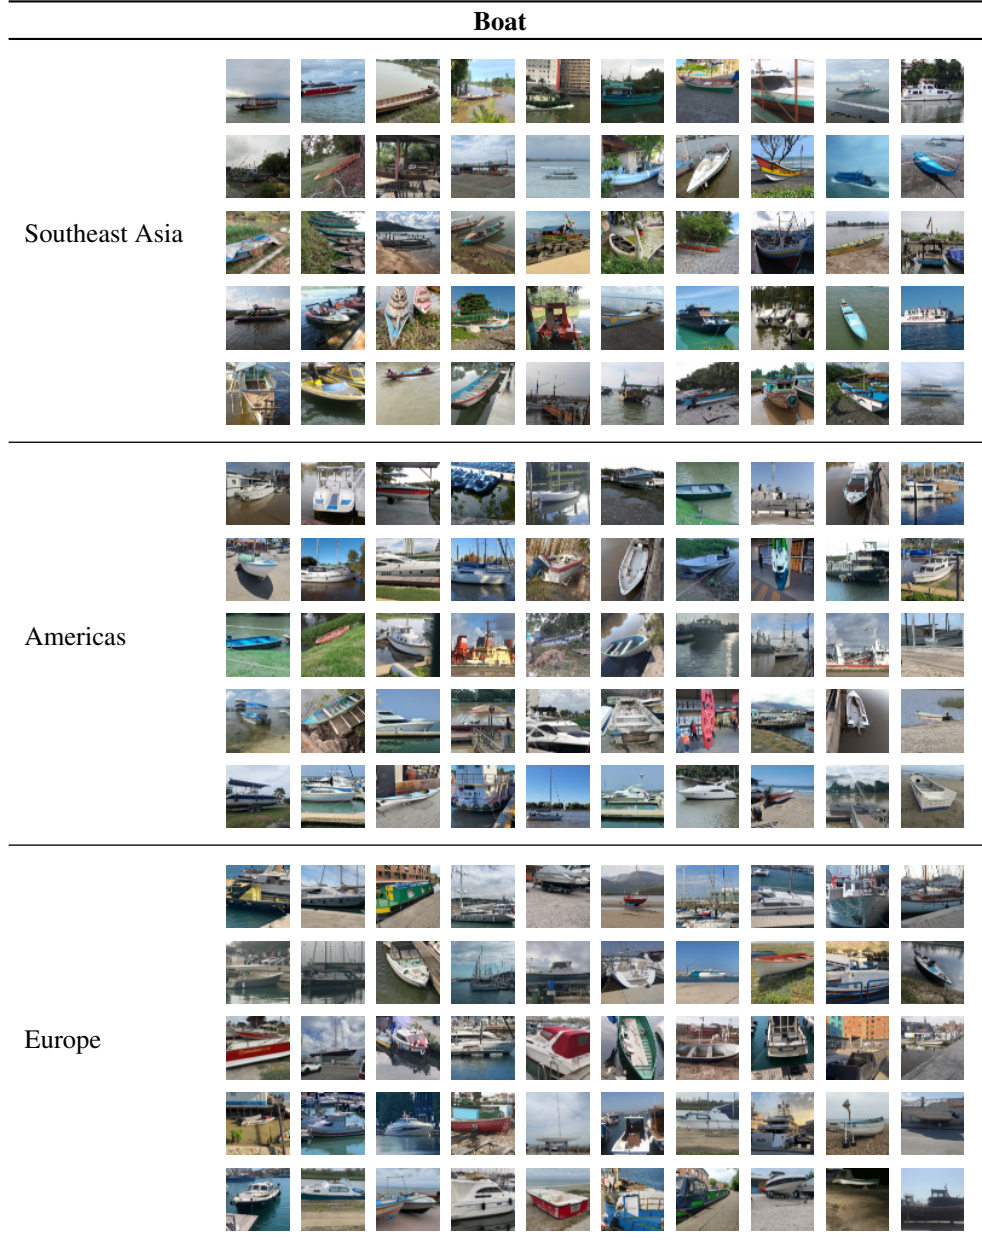

Figure 11: Randomly chosen images for “boat” for the 3 other regions. We again see a variety of boats ranging from motor boats in Europe and the Americas to smaller boats in Southeast Asia.

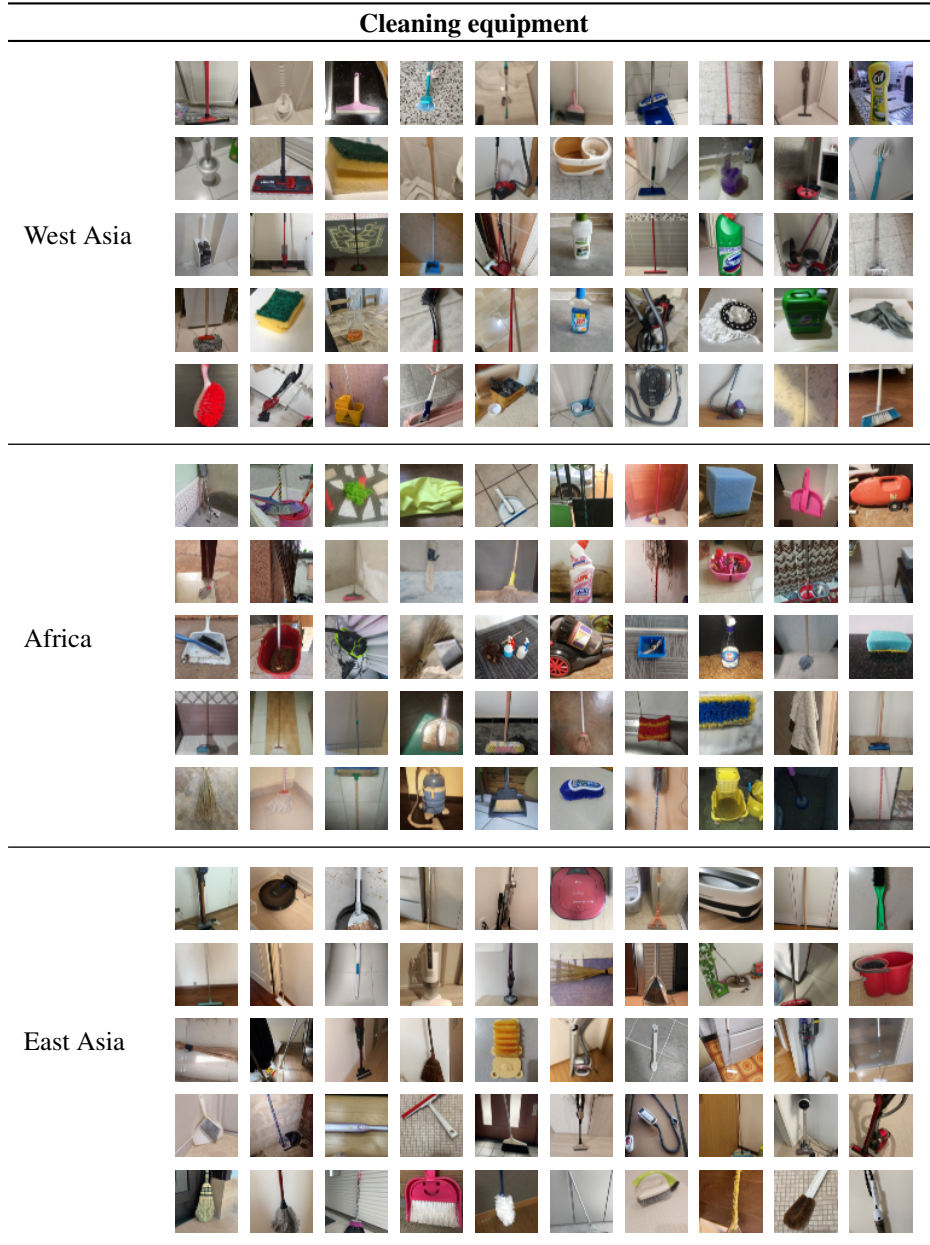

Figure 12: Randomly chosen images for “cleaning equipment” for 3 regions. This appears to be a diverse category within all regions containing images of mops, buckets, products, brooms, etc.

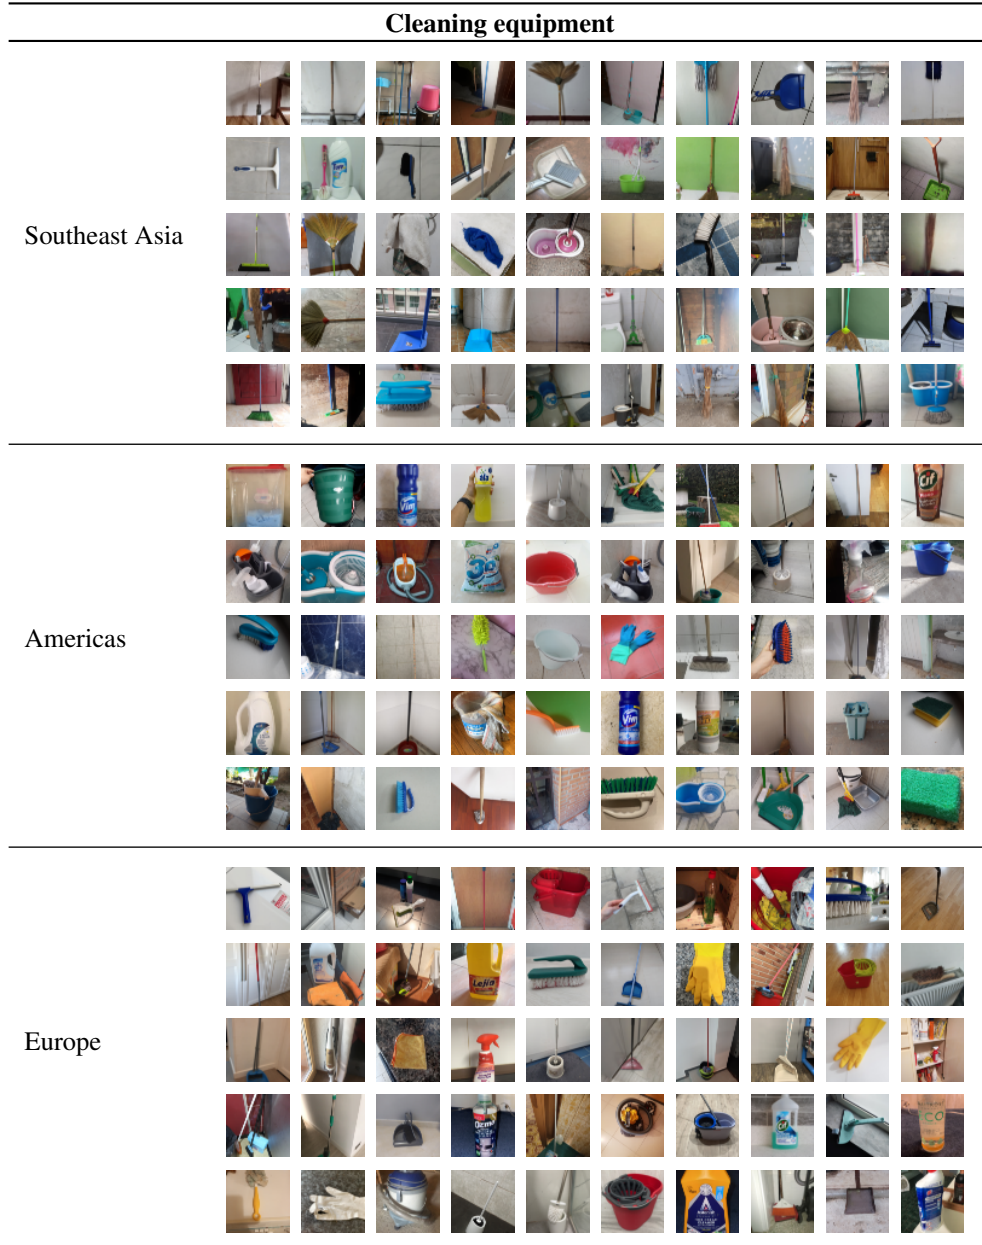

Figure 13: Randomly chosen images for “cleaning equipment” for the 3 other regions. This appears to be a diverse category within all regions containing images of mops, buckets, products, brooms, etc.

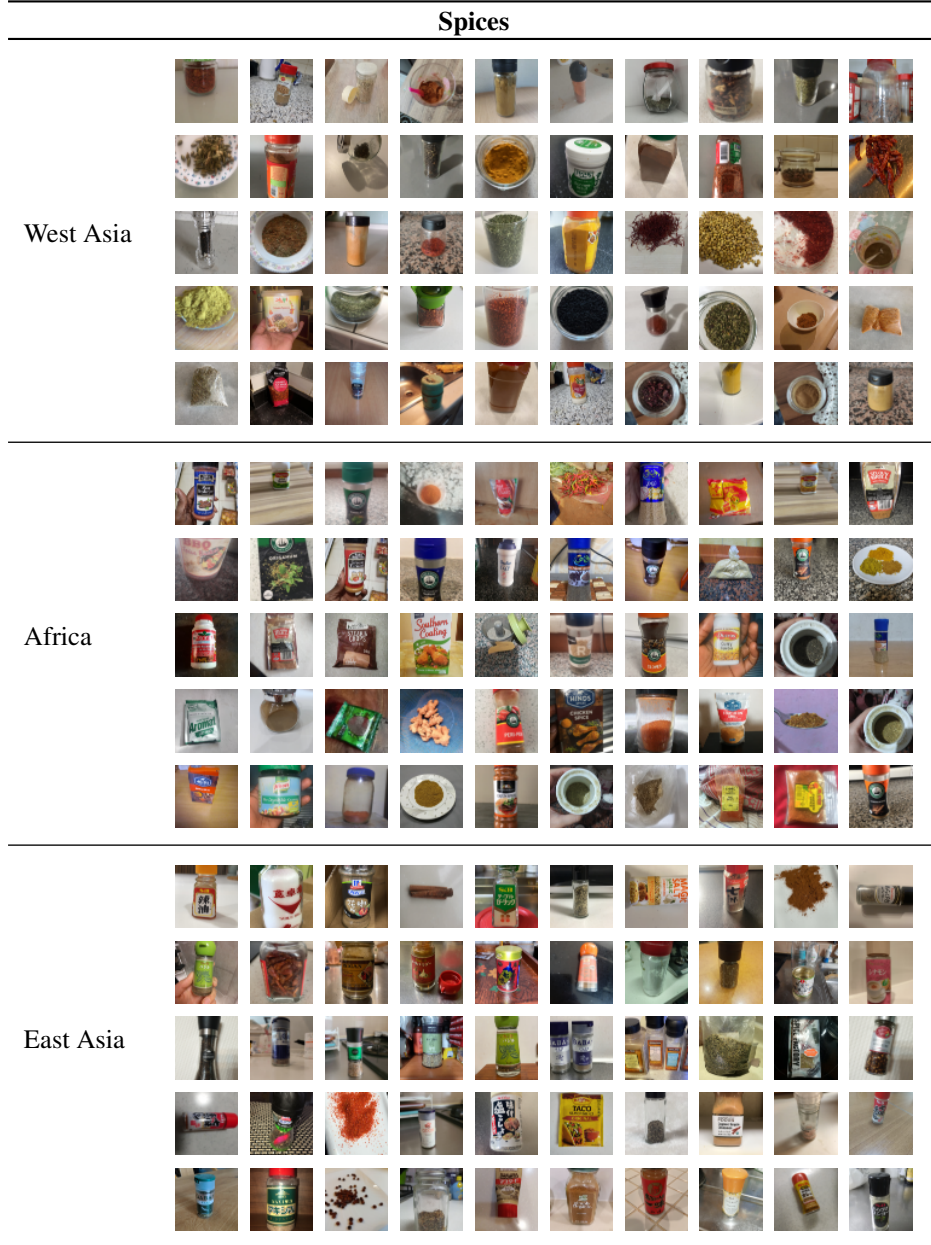

Figure 14: Randomly chosen images for “spices” for 3 regions. We see a wide range of containers, ranging from packets (mostly in Africa), glass jars (in West Asia) to some bottles (all regions).

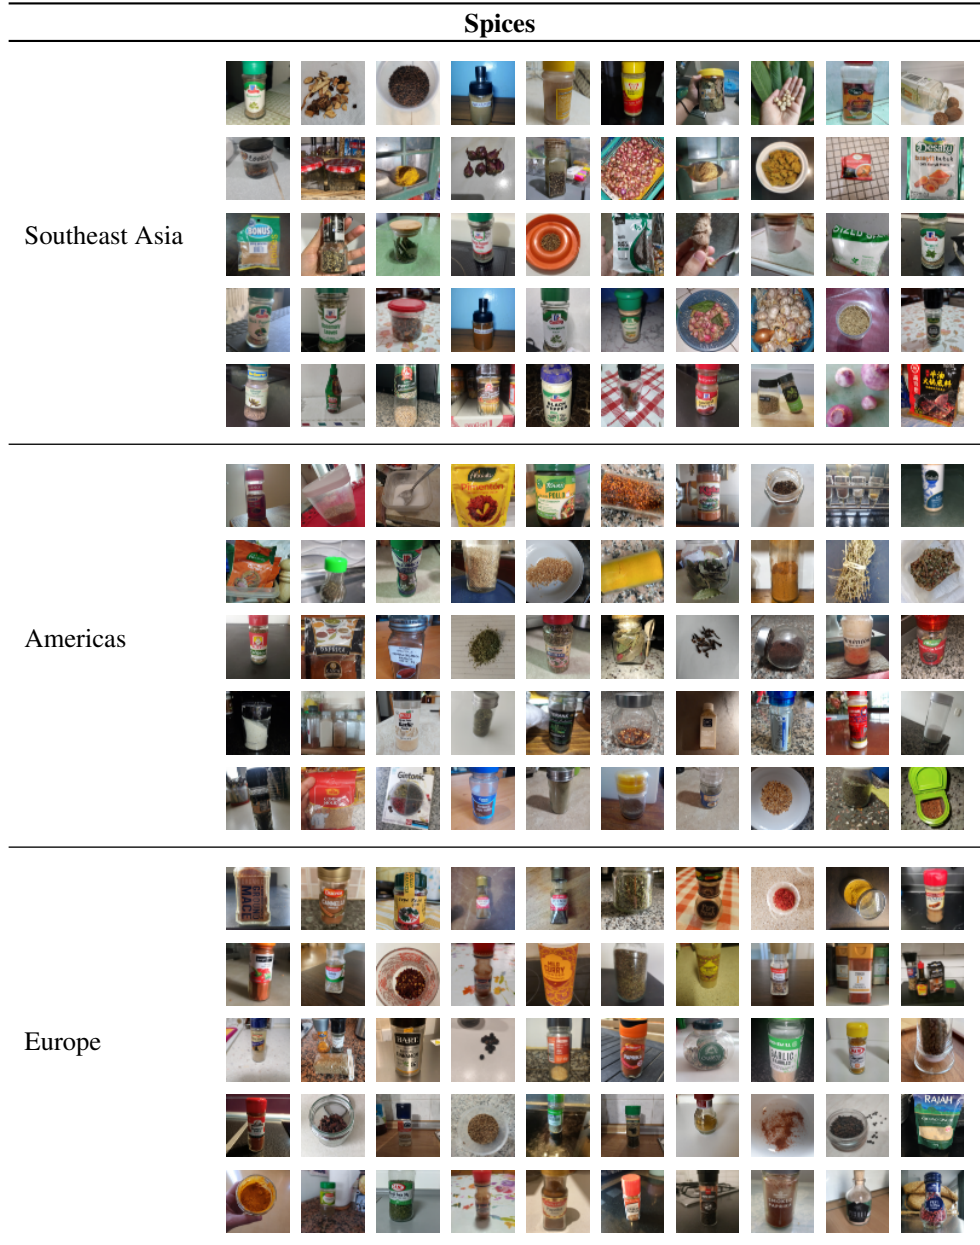

Figure 15: Randomly chosen images for “spices” for 3 regions. We see a wide range of containers, ranging from packets (some in Southeast Asia and Americas) to bottles (some in Southeast Asia)

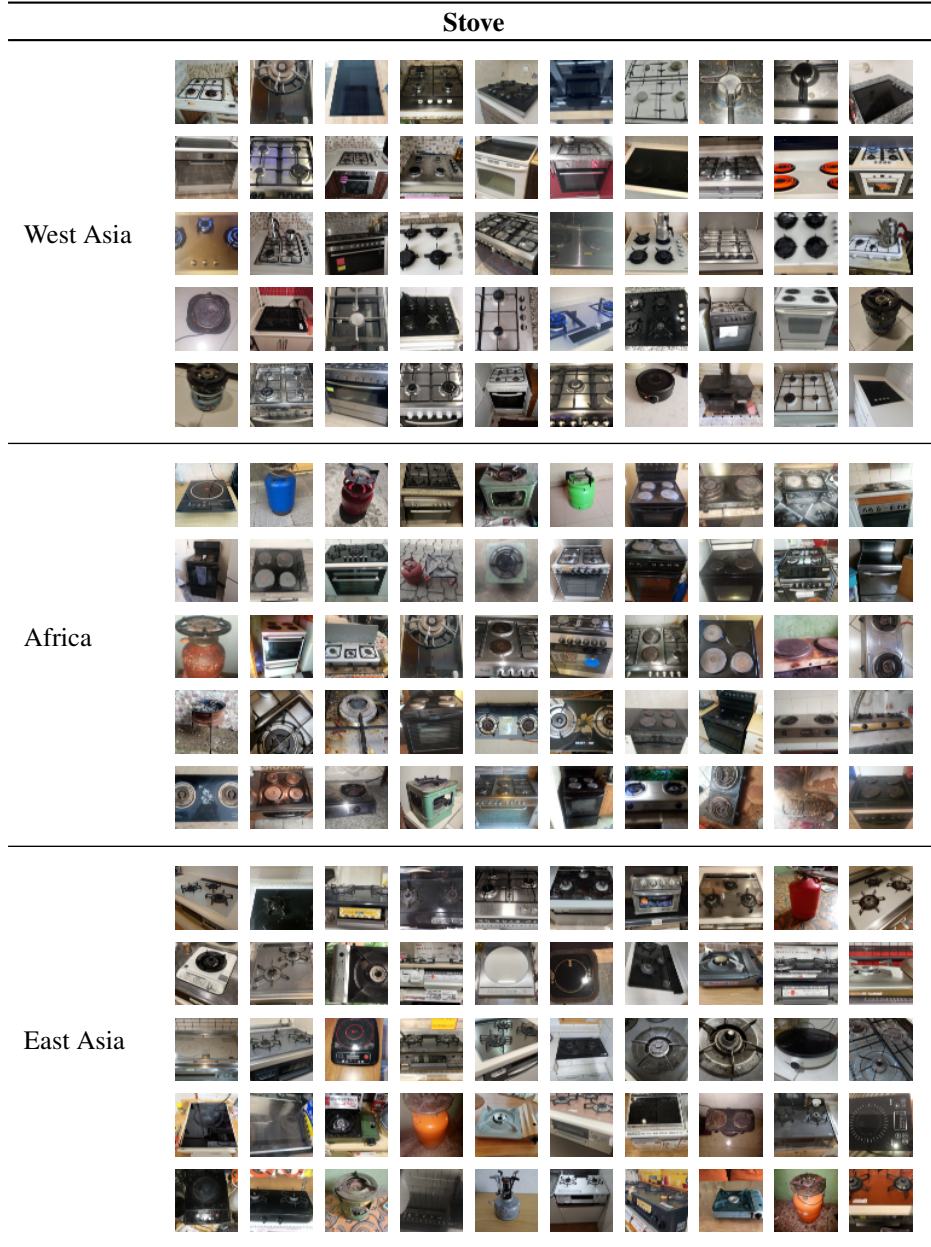

Figure 16: Randomly chosen images for “stove” for 3 regions. We see that Africa and East Asia contain one-burner and two burner stoves (along with 4 burner stoves). We also see a variety of stoves in terms of induction, gas, ovens, etc.

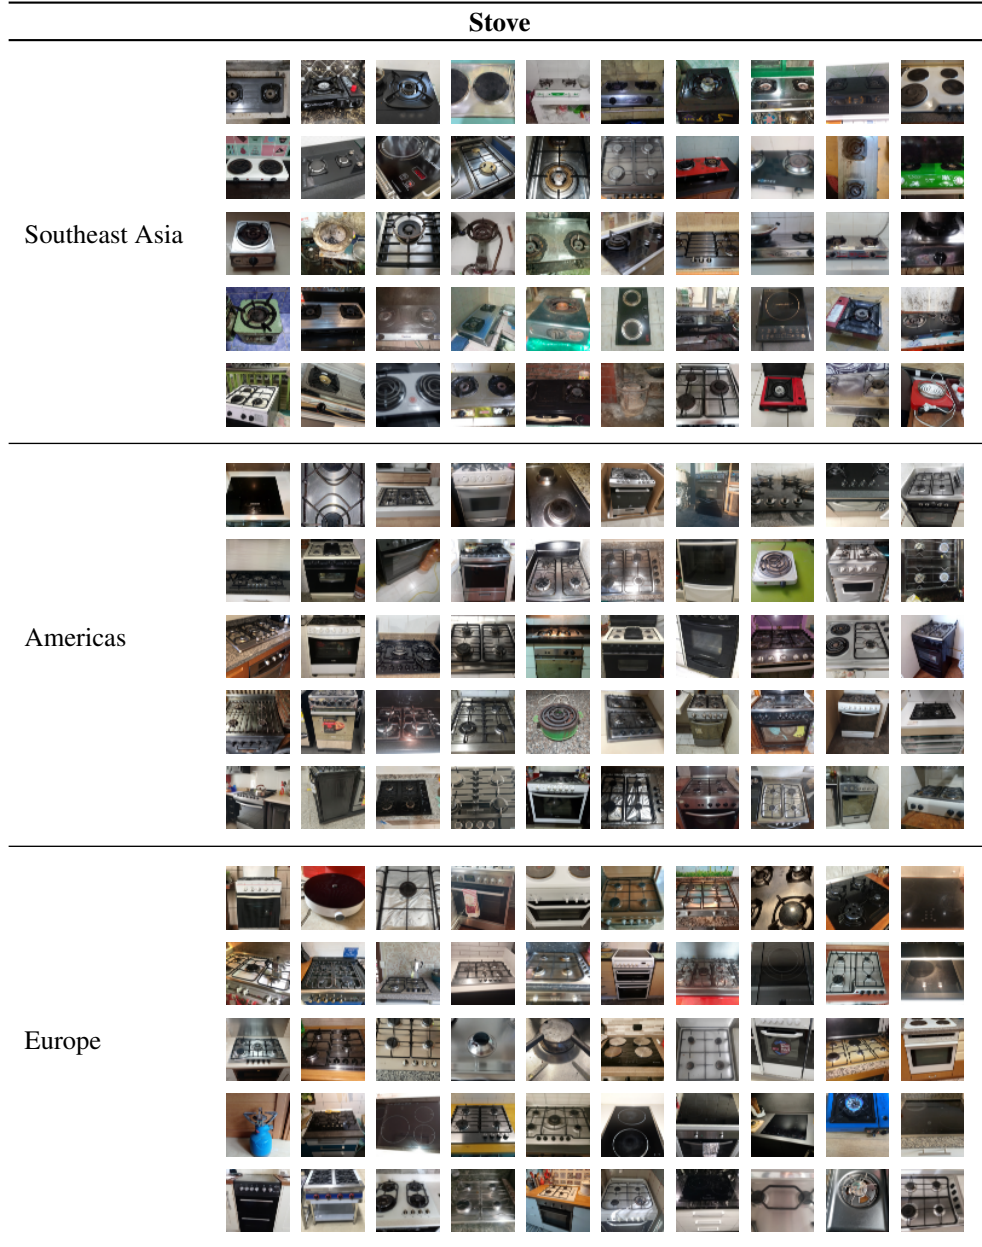

Figure 17: Randomly chosen images for “stove” for 3 regions. We see that Southeast Asia contains one-burner and two burner stoves (along with 4 burner stoves). We also see a variety of stoves in terms of induction, coils, gas, ovens, etc.

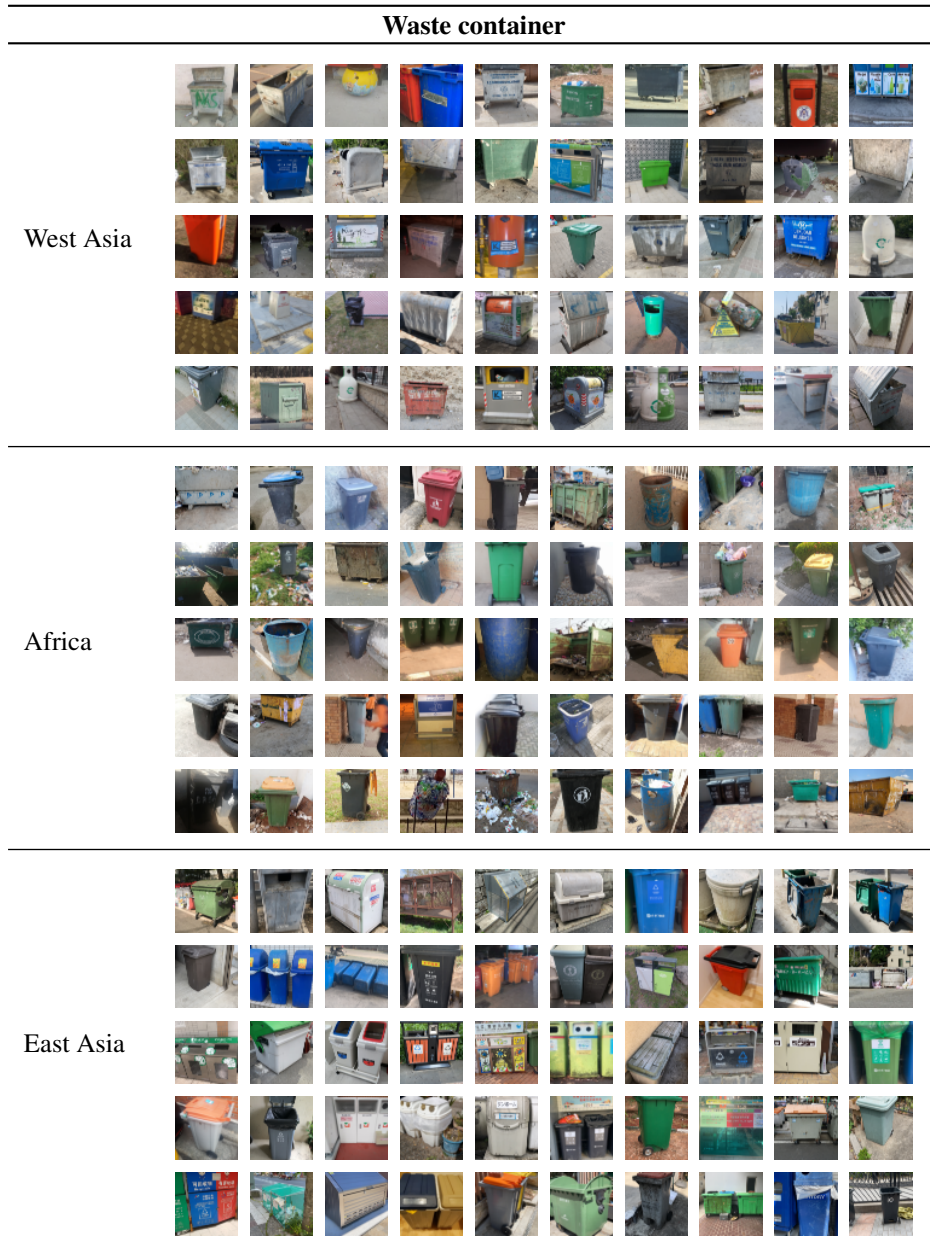

Figure 18: Randomly chosen images for “waste container” for 3 regions. We see that different regions have containers of varying sizes (Africa seems to be smaller than West Asia or East Asia), and have different closing mechanisms (see West Asia r5c6 as an interesting example.) East Asia also tends to have segregated waste containers.

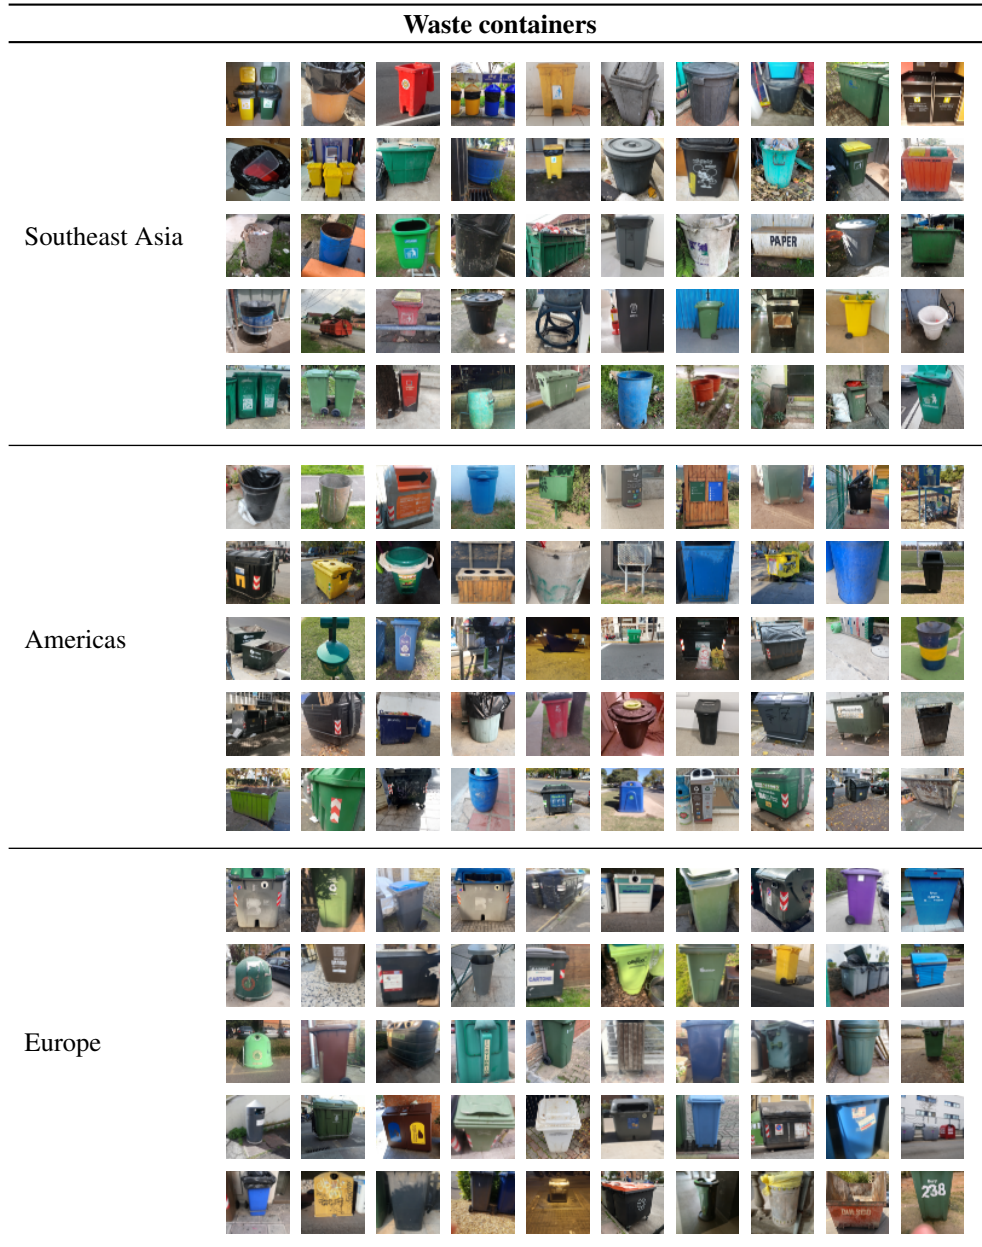

Figure 19: Randomly chosen images for “waste container” for 3 regions. We see that different regions have containers of varying sizes (Europe seems to have containers of very different sizes) and have different closing mechanisms (see Southeast Asia r2c6 as an interesting example.)

|                          | West Asia  | Africa | East Asia  | Southeast Asia | Americas   | Europe |
|--------------------------|------------|--------|------------|----------------|------------|--------|
| backyard                 | 216        | 670    | 192        | 218            | 217        | 226    |
| bag                      | 267        | 397    | 370        | 593            | 298        | 437    |
| bicycle                  | 237        | 257    | 298        | 235            | 228        | 241    |
| boat                     | <b>162</b> | 227    | <b>174</b> | 237            | <b>84</b>  | 222    |
| bus                      | 203        | 240    | 223        | 214            | 217        | 226    |
| candle                   | 232        | 244    | 220        | 239            | 188        | 270    |
| car                      | 242        | 331    | 276        | 235            | 273        | 363    |
| chair                    | 279        | 365    | 326        | 512            | 344        | 349    |
| cleaning equipment       | 259        | 284    | 307        | 305            | 270        | 361    |
| cooking pot              | 216        | 270    | 228        | 202            | 213        | 304    |
| dog                      | 219        | 194    | 185        | 244            | 206        | 193    |
| dustbin                  | 220        | 423    | 266        | 203            | 271        | 294    |
| fence                    | 259        | 322    | 244        | 302            | 226        | 282    |
| flag                     | 206        | 265    | <b>139</b> | 223            | 206        | 272    |
| front_door               | 210        | 254    | 216        | 224            | 200        | 235    |
| hairbrush/comb           | 269        | 255    | 307        | 300            | 290        | 431    |
| hand soap                | 222        | 208    | 277        | 191            | 245        | 362    |
| hat                      | 209        | 297    | 337        | 316            | 294        | 336    |
| house                    | 199        | 437    | 208        | 195            | 277        | 194    |
| jug                      | 217        | 211    | 186        | 249            | 236        | 194    |
| light fixture            | 234        | 344    | 248        | 209            | 191        | 300    |
| light switch             | 215        | 240    | 246        | 273            | 273        | 234    |
| lighter                  | 221        | 312    | 225        | 237            | 217        | 268    |
| medicine                 | 242        | 286    | 310        | 330            | 328        | 300    |
| monument                 | <b>161</b> | 191    | 186        | 183            | 254        | 245    |
| plate of food            | 211        | 480    | 294        | 364            | 241        | 304    |
| religious building       | 222        | 230    | 204        | 226            | 197        | 229    |
| road sign                | 226        | 416    | 258        | 270            | 235        | 284    |
| spices                   | 243        | 250    | 331        | 216            | 290        | 300    |
| stall                    | <b>143</b> | 215    | 203        | 227            | 197        | 221    |
| storefront               | 209        | 306    | 191        | 240            | 243        | 204    |
| stove                    | 199        | 553    | 191        | 262            | 206        | 282    |
| streetlight / lantern    | 202        | 346    | 211        | 196            | 208        | 227    |
| toothbrush               | 264        | 258    | 330        | 361            | 337        | 270    |
| toothpaste / toothpowder | 209        | 288    | 269        | 230            | 245        | 315    |
| toy                      | 224        | 221    | 280        | 292            | 323        | 287    |
| tree                     | 226        | 308    | 245        | 357            | 300        | 328    |
| truck                    | 205        | 246    | 207        | 231            | 212        | 225    |
| waste container          | 231        | 213    | 209        | 213            | 211        | 253    |
| wheelbarrow              | <b>122</b> | 267    | <b>130</b> | 197            | <b>152</b> | 243    |

Table 3: We show the counts of objects per region in GeoDE. **Bolded** are the ones categories for which we were not able to get 175 images per region.

- 429 [8] William A Gaviria Rojas, Sudnya Diamos, Keertan Ranjan Kini, David Kanter, Vijay Janapa Reddi, and  
430 Cody Coleman. The dollar street dataset: Images representing the geographic and socioeconomic diversity  
431 of the world. In *NeurIPS Datasets & Benchmarks Track*, 2022.
- 432 [9] Emma Strubell, Ananya Ganesh, and Andrew McCallum. Energy and policy considerations for deep  
433 learning in nlp. In *ACL*, 2019.
- 434 [10] Antonio Torralba and Alexei A Efros. Unbiased look at dataset bias. In *CVPR*, 2011.
